## SHORT COMMUNICATION

# ARE CALCIUM AND STRONTIUM TRANSPORTED BY THE SAME MECHANISM IN THE HERMATYPIC CORAL *GALAXEA FASCICULARIS*?

BY Y. K. IP AND A. L. L. LIM

*Department of Zoology, National University of Singapore, Kent Ridge, Singapore 0511*

*Accepted 11 June 1991*

Information concerning  $\text{Sr}^{2+}$  content in biogenic carbonates is important for the evaluation of palaeoenvironmental and palaeoecological conditions (Dal Negro and Ungaretti, 1971). Odum (1957) and Goreau (1961) reported that corals were apparently unable to discriminate between  $\text{Sr}^{2+}$  and  $\text{Ca}^{2+}$  in the process of skeletogenesis. Later, Kinsman (1969) proposed that reef coral aragonite was in chemical equilibrium with sea water as far as  $\text{Sr}^{2+}$  was concerned, and suggested the use of the distribution coefficient for  $\text{Sr}^{2+}$ ,  $K_{\text{Sr}}^{\Delta}$ , as an indicator of sediment origin and diagenesis. However, reports from other laboratories indicate significant differences in the relative proportions of  $\text{Ca}^{2+}$  and  $\text{Sr}^{2+}$  between coelenterate carbonates and ocean water (Harris and Almy, 1964; Thompson and Livingston, 1970). It is becoming increasingly clear that our earlier expectations for utilizing the chemical composition of biogenic carbonates as an important source of information about palaeoenvironmental conditions are not going to be realized until much is learned about the complex physiological processes involved in skeletal calcification (Weber, 1973).

During calcification, large amounts of  $\text{Ca}^{2+}$  must be removed from sea water, transported across cells with a typically low intracellular  $\text{Ca}^{2+}$  concentration (Goreau and Bowen, 1955) and precipitated as an extracellular aragonite skeleton. Chalker (1981), who proved that the deposition of  $^{45}\text{Ca}^{2+}$  in *Acropora cervicornis* followed Michaelis–Menten kinetics and was inhibited by dinitrophenol, indirectly concluded that  $\text{Ca}^{2+}$  was actively transported to the site of skeletogenesis. By showing stable  $\text{Sr}^{2+}$  to be a competitive inhibitor of  $^{45}\text{Ca}^{2+}$  deposition, Chalker (1981) further concluded that  $\text{Ca}^{2+}$  and  $\text{Sr}^{2+}$  depositions in corals involved similar biochemical mechanisms. Goreau (1977) postulated that  $\text{Sr}^{2+}$  was transported by the same biochemical ion pumps as calcium in corals. He arrived at this conclusion not by experimentation, but from the observation that mitochondrial uptake of  $\text{Sr}^{2+}$  is not discriminated from calcium uptake. Ip and Krishnaveni (1991), however, showed that stable  $\text{Sr}^{2+}$  exhibited mixed, instead of purely competitive,

**Key words:** *Galaxea fascicularis*, coral, calcium, strontium, transport, calcification, skeletogenesis.

inhibition of  $^{45}\text{Ca}^{2+}$  deposition in *Galaxea fascicularis*. They also proved the kinetics of  $^{90}\text{Sr}^{2+}$  and  $^{45}\text{Ca}^{2+}$  depositions in *G. fascicularis* to be dissimilar and proposed that different transport mechanisms might be involved.

It is well established that a membrane-bound  $\text{Ca}^{2+}$ -stimulated adenosine triphosphatase (ATPase) is associated with the active transport of  $\text{Ca}^{2+}$  across cell membranes (Schatzmann, 1975; Larsen *et al.* 1978). The most direct study on the  $\text{Ca}^{2+}$  transport mechanism in corals was by Isa *et al.* (1980), who demonstrated the presence of ATPase activities, activated by either  $\text{Ca}^{2+}$  or  $\text{Mg}^{2+}$ , in the crude extract of the animal fraction of the hermatypic coral *Acropora hebes*. However, no attempt was made to elucidate the subcellular origin of the  $\text{Ca}^{2+}$ -ATPase studied or to verify the presence of a high-affinity component of the enzyme activity, which is needed to compensate for the low  $\text{Ca}^{2+}$  concentration within the cell. It is also unknown whether  $\text{Sr}^{2+}$  can replace  $\text{Ca}^{2+}$  in activating this ATPase. In view of the importance of biogenic carbonates to geochemical and geological problems, the present investigation was undertaken to elucidate whether  $\text{Ca}^{2+}$  and  $\text{Sr}^{2+}$  are transported by the same mechanism in *G. fascicularis*.

*Galaxea fascicularis* (Linnaeus) were obtained from coral reefs off Singapore ( $103^{\circ}45'$ ,  $1^{\circ}13'$ ). Twenty to thirty polyps were trimmed off from the colony and pounded 35–40 times with a pestle in a 50 ml mortar. Approximately 250–300 *G. fascicularis* polyps were used for the extraction of  $\text{Ca}^{2+}$ -ATPase. The crushed polyps were transferred to a beaker containing approximately 1 ml per polyp of ice-cold homogenizing buffer (HB) consisting of  $0.25 \text{ mol l}^{-1}$  sucrose,  $5.0 \text{ mmol l}^{-1}$  disodium EDTA and  $10 \text{ mmol l}^{-1}$  imidazole (pH 7.8). All subsequent isolation steps were performed at  $0\text{--}4^{\circ}\text{C}$ . Coral tissues were dislodged from the skeletal fragments, by rubbing them gently between fingers, stirred and decanted. The decanted sample was then homogenized once by an Ikawerk Staufen Ultra-Turrax (Janke and Kunkel Co.) homogenizer at minimum speed for 15 s to release the zooxanthellae from the coral tissues. A 0.5 ml sample of the homogenate was removed for total chlorophyll *a* determination following the method of Jeffrey and Humphrey (1975). The homogenate was centrifuged at  $600 \text{ g}$  for 15 min to precipitate the zooxanthellae and unbroken cells. The resulting supernatant fluid was decanted through two layers of cheesecloth. Chlorophyll *a* analyses were performed on samples of the supernatant fluid and the resuspended precipitate. Only supernatant fluid containing less than 5% of the total chlorophyll *a* was used for the  $\text{Ca}^{2+}$ -ATPase extraction. The supernatant fluid was further homogenized with 15 strokes in an all-glass 15 ml Wheaton tissue grinder and centrifuged at  $25\,000 \text{ g}$  for 30 min. The supernatant fluid obtained was further centrifuged at  $35\,000 \text{ g}$  for 1 h to obtain the heavy microsomal fraction containing plasma membranes. This precipitate was resuspended in HB by homogenizing with two strokes in a 15 ml Wheaton Teflon pestle homogenizer and centrifuged at  $35\,000 \text{ g}$  for 1 h. The washing procedure in HB was repeated once more. The resulting precipitate was next suspended by homogenizing with 2–3 strokes in the Teflon pestle homogenizer in a suspension buffer (SB) containing  $0.5 \text{ mmol l}^{-1}$  imidazole and  $0.6 \text{ mmol l}^{-1}$  Tris-HCl (pH 7.8) and centrifuged at  $35\,000 \text{ g}$  for 1 h. The pellet

was resuspended in the same buffer and centrifuged twice at 100 000  $g$  for 1 h to remove the EDTA. The final pellet was resuspended in 12 ml of SB, homogenized till homogeneous and stored at  $-80^{\circ}\text{C}$ . This preparation of coral  $\text{Ca}^{2+}$ -ATPase was used within 3 days from the time of extraction. Preliminary studies using alkaline phosphatase, assayed according to Bergmeyer *et al.* (1974), as the marker for plasma membranes indicated that this enzyme was enriched 3.1-fold in the heavy microsomal fraction; recovery was 30 %.

To determine the various ATPase activities, the reaction mixture contained, in a final volume of 2 ml, 0.1 ml of sample (0.08–0.09 mg of protein),  $40\text{ mmol l}^{-1}$  Tris-HCl (pH 7.0), various concentrations of specified ions and  $3\text{ mmol l}^{-1}$  ATP (pH 7.0) (unless stated otherwise). The reaction medium without ATP was preincubated at  $27^{\circ}\text{C}$  for 10 min and the reaction was initiated by the addition of 0.1 ml of ATP. After 5 min of incubation at  $27^{\circ}\text{C}$ , the reaction was terminated by the addition of 0.5 ml of 7.2 % tungstosilicic acid in  $5\text{ mol l}^{-1}$  sulphuric acid. Inorganic phosphate ( $\text{P}_i$ ) released from ATP hydrolysis was determined according to the method of Martin and Doty (1949). The specified ATPase activity, expressed as  $\mu\text{mol P}_i$  released  $\text{mg}^{-1}$  protein  $\text{min}^{-1}$ , was obtained as the difference in activities assayed in the presence and absence of the specified ion(s), unless stated otherwise.

Standard  $\text{Ca}^{2+}$ -ATPase activity was determined in the presence of either  $0.005\text{ mmol l}^{-1}$  (high-affinity) or  $0.15\text{ mmol l}^{-1}$   $\text{CaCl}_2$  (low-affinity). For the studies on the effect of  $\text{Ca}^{2+}$  concentration on the  $\text{Ca}^{2+}$ -ATPase activity, a  $\text{Ca}^{2+}$  concentration range of  $0.5\text{ }\mu\text{mol l}^{-1}$  to  $10\text{ mmol l}^{-1}$  was used. ATP (0.1 ml) was added at a final concentration of  $0.75\text{ mmol l}^{-1}$  to start the reaction.  $\text{Sr}^{2+}$ -ATPase activity was assayed in the presence of either  $0.2$  or  $1.0\text{ mmol l}^{-1}$   $\text{SrCl}_2$ . For  $\text{Mg}^{2+}$ -ATPase and  $\text{Mn}^{2+}$ -ATPase assays,  $5\text{ mmol l}^{-1}$   $\text{MgCl}_2$  and  $5\text{ mmol l}^{-1}$   $\text{MnCl}_2$  were included in the reaction mixture, respectively.  $\text{Na}^+/\text{K}^+$ -ATPase activity was determined in the presence of  $100\text{ mmol l}^{-1}$  NaCl,  $10\text{ mmol l}^{-1}$  KCl and  $5\text{ mmol l}^{-1}$   $\text{MgCl}_2$ . The  $\text{Na}^+/\text{K}^+$ -ATPase activity was obtained as the difference in enzyme activities assayed in the presence and absence of  $1\text{ mmol l}^{-1}$  ouabain.

Protein content of the sample was determined by the method of Lowry *et al.* (1951) with bovine serum albumin (Sigma Chemical Company) as the standard for comparison.

Results were presented as means  $\pm$  s.e. Student's *t*-test was used to evaluate the difference between means. Differences with  $P < 0.05$  were taken as significant. Linear regression analyses were based on the least-squares method.

$\text{Ca}^{2+}$ -ATPase activity in the plasma-membrane-enriched heavy microsomal fraction isolated from *G. fascicularis* exhibited saturation kinetics. Woolf-Augustinnson-Hofstee transformation of data (Hofstee *et al.* 1959) revealed, for the first time, a high-affinity component of  $\text{Ca}^{2+}$ -ATPase together with a low-affinity component in the heavy microsomal fraction of a coral (Fig. 1). The  $K_m$  and  $V_{\text{max}}$  values for the high-affinity component were  $0.002\text{ mmol l}^{-1}$  and  $0.048\text{ }\mu\text{mol P}_i\text{ mg}^{-1}$  protein  $\text{min}^{-1}$ , respectively. The respective values for the low-affinity component were  $0.16\text{ mmol l}^{-1}$  and  $0.75\text{ }\mu\text{mol P}_i\text{ mg}^{-1}$  protein  $\text{min}^{-1}$ .  $\text{Mg}^{2+}$

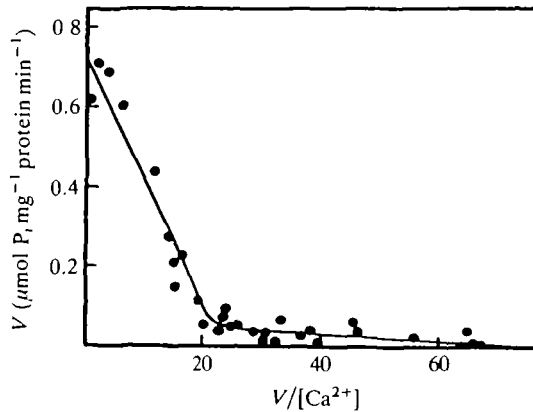

Fig. 1. Woolf-Augustinsson-Hofstee plot of the effect of substrate ( $\text{Ca}^{2+}$ ) concentration on the specific activity ( $V$ ;  $\mu\text{mol P}_i \text{mg}^{-1} \text{protein min}^{-1}$ ) of  $\text{Ca}^{2+}$ -ATPase in the heavy microsomal fraction isolated from *Galaxea fascicularis*.

is generally regarded as a necessary component for the assay of the plasma membrane  $\text{Ca}^{2+}$ -ATPase. It is possible that, like the plasma membrane fractions isolated from the corpus luteum (Verma and Penniston, 1981) and adipocytes (Pershadsingh and McDonald, 1980), a minute quantity of membrane-endogenous  $\text{Mg}^{2+}$  was retained in this preparation. Ruthenium red ( $0.02 \text{ mmol l}^{-1}$ ), a potent inhibitor of mitochondrial calcium uptake (Reed and Bygrave, 1974) and the calcium pump of red blood cell ghosts (Sarkadi *et al.* 1980), completely inhibited the activity of the high-affinity  $\text{Ca}^{2+}$ -ATPase from *G. fascicularis* and significantly inhibited the activity of the low-affinity component by  $56.1 \pm 6.2\%$  ( $N=3$ ). Hence, it is probable that the  $\text{Ca}^{2+}$ -ATPase assayed in this plasma-membrane-enriched microsomal fraction is the enzyme responsible for the transport of  $\text{Ca}^{2+}$  in *G. fascicularis*.

Activities of  $\text{Mg}^{2+}$ -ATPase ( $1.66 \pm 0.12 \mu\text{mol P}_i \text{mg}^{-1} \text{protein min}^{-1}$ ,  $N=4$ ),  $\text{Mn}^{2+}$ -ATPase ( $1.63 \pm 0.03 \mu\text{mol P}_i \text{mg}^{-1} \text{protein min}^{-1}$ ,  $N=5$ ) and  $\text{Na}^+/\text{K}^+$ -ATPase ( $0.23 \pm 0.05 \mu\text{mol P}_i \text{mg}^{-1} \text{protein min}^{-1}$ ,  $N=4$ ) were also detected in this microsomal fraction extracted from *G. fascicularis*. However, when tested at concentrations of 0.2 and 1  $\text{mmol l}^{-1}$ ,  $\text{Sr}^{2+}$  was unable to activate the ATPase activity in the same fraction. Hence, it can be deduced that  $\text{Sr}^{2+}$  cannot substitute for  $\text{Ca}^{2+}$  in activating the  $\text{Ca}^{2+}$ -ATPase in *G. fascicularis*. No  $\text{Sr}^{2+}$ -ATPase activity was detected in any other subcellular fractions isolated from this coral. Instead,  $\text{Sr}^{2+}$  competitively inhibited  $\text{Ca}^{2+}$ -ATPase activities in the heavy microsomal fraction of *G. fascicularis*, with  $K_i$  values of  $0.0085 \text{ mmol l}^{-1}$  for the high-affinity and  $2.06 \text{ mmol l}^{-1}$  for the low-affinity component (Fig. 2). It is generally accepted that the selectivity of the plasma membrane  $\text{Ca}^{2+}$  pump for  $\text{Ca}^{2+}$  is not high, since other divalent metal ions can replace  $\text{Ca}^{2+}$  in the transport cycle. In resealed red blood cell ghosts,  $\text{Sr}^{2+}$  is transported in the same way as  $\text{Ca}^{2+}$  (Schatzmann and Vincenzi, 1969). Hydrolysis of ATP by a purified preparation of the enzyme from human red blood cell membranes is stimulated by alkaline metal earth cations in

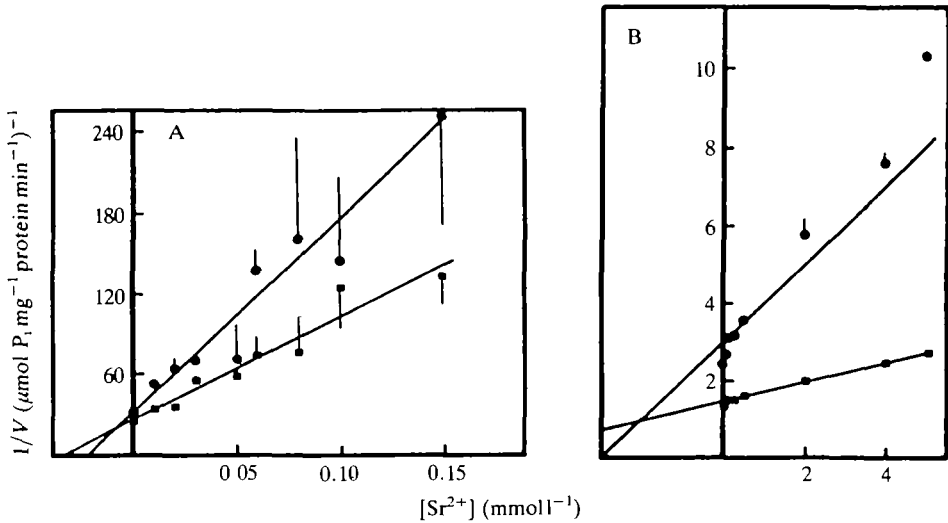

Fig. 2. (A) Dixon plot of the effect of  $\text{Sr}^{2+}$  concentration on the specific activity ( $V$ ;  $\mu\text{mol P}_i \text{ mg}^{-1} \text{ protein min}^{-1} \pm \text{s.e.}$ ,  $N=3$ ) of the high-affinity component of the  $\text{Ca}^{2+}$ -ATPase, measured at  $\text{Ca}^{2+}$  concentrations of either  $0.006$  (●) or  $0.01 \text{ mmol l}^{-1}$  (■), in the heavy microsomal fraction isolated from *Galaxea fascicularis*. (B) Dixon plot of the effect of  $\text{Sr}^{2+}$  concentration on the specific activity of the low-affinity component of the  $\text{Ca}^{2+}$ -ATPase, measured at  $\text{Ca}^{2+}$  concentrations of either  $0.15$  (■) or  $1.0 \text{ mmol l}^{-1}$  (●), in the heavy microsomal fraction isolated from *G. fascicularis*.

the order  $\text{Ca}^{2+} > \text{Sr}^{2+} \gg \text{Ba}^{2+}$ .  $\text{Sr}^{2+}$  is about as effective as  $\text{Ca}^{2+}$  but its apparent affinity is lower. In this regard, the  $\text{Ca}^{2+}$ -ATPase of *G. fascicularis* is different from those of other organisms reported in the literature.

Contrary to previous hypotheses (Goreau, 1977; Chalker, 1981), the results indicate that  $\text{Ca}^{2+}$  and  $\text{Sr}^{2+}$  are transported by different mechanisms in *G. fascicularis*. Although calcification processes in reef corals involve only a negligible change in the molar  $\text{Sr}^{2+}/\text{Ca}^{2+}$  ratio during passage from sea water to the calcification site (Gunatilaka, 1981), the  $\text{Ca}^{2+}$ -ATPase involved can effectively discriminate between  $\text{Ca}^{2+}$  and  $\text{Sr}^{2+}$ . Whether  $\text{Sr}^{2+}$  transport in *G. fascicularis* involves a mediated or vesicular process without any direct requirement for ATP is uncertain, although Ip and Krishnaveni (1991) have shown that  $\text{Sr}^{2+}$  deposition in *G. fascicularis* is linearly dependent on  $\text{Sr}^{2+}$  concentration (up to  $20 \text{ mmol l}^{-1}$ ) and unaffected by the presence of  $1 \text{ mmol l}^{-1}$  KCN. It is also possible that  $\text{Sr}^{2+}$  transport in *G. fascicularis* takes a paracellular route, as has been suggested for the epiphyseal growth plate (Krefting *et al.* 1988).

From these results, we can understand why the deposition of  $\text{Sr}^{2+}$ , unlike that of  $\text{Ca}^{2+}$ , in *G. fascicularis* is unaffected by light and refractory to 3-(3,4-dichlorophenyl)-1,1-dimethylurea, an inhibitor of photosynthesis (Ip and Krishnaveni, 1991). Reef-building scleractinians are described as hermatypic and contain within their cells large populations of endosymbiotic zooxanthellae. Several hypotheses have been proposed to explain the light stimulation of calcification in corals. It is

possible that photosynthesis acts by providing an energy source for the active transport of  $\text{Ca}^{2+}$ , either in the form of carbohydrate or by leakage of a high-energy phosphate compound (Chapman, 1974). The observation that no  $\text{Sr}^{2+}$ -stimulated ATPase activity was detected in *G. fascicularis* would necessarily lead to the conclusion that the ratio of  $\text{Sr}^{2+}$  to  $\text{Ca}^{2+}$  depositions will be smaller in the presence of light than in total darkness. Such a conclusion supports the hypothesis that differences in  $K_{\text{Sr}}^{\text{A}}$  in hermatypic and ahermatypic corals are attributable to marked differences in growth rates as a result of the presence of algal endosymbionts in the hermatypes (Thompson and Livingston, 1970). It would also explain previous reports on reef corals that lower skeletal  $\text{Sr}^{2+}$  contents are associated with higher rates of calcification (Weber, 1973). Hence, the  $\text{Sr}^{2+}/\text{Ca}^{2+}$  ratio of reef coral aragonite may not necessarily reflect the chemical composition of the sea water.

### References

- BERGMEYER, H. U., GAWEHN, K. AND GRASSL, M. (1974). Enzymes as biochemical reagents. In *Methods of Enzymatic Analysis*, vol. 1 (ed. H. U. Bergmeyer), pp. 425–522. Weinheim: Verlag Chemie GmbH.
- CHALKER, B. E. (1981). Skeletogenesis in scleractinian corals: The transport and deposition of strontium and calcium. In *Handbook of Stable Strontium* (ed. S. C. Skoryna), pp. 47–63. New York: Plenum Press.
- CHAPMAN, G. (1974). The skeletal system. In *Coelenterate Biology: Reviews and New Perspectives* (ed. L. Muscatine and H. M. Lenhoff), pp. 93–128. New York: Academic Press.
- DAL NEGRO, A. AND UNGARETTI, L. (1971). Refinement of the crystal structure of aragonite. *Am. Mineral* **56**, 768–772.
- GOREAU, T. F. (1961). Problems of growth and calcium deposition in reef corals. *Endeavour* **20**, 32–39.
- GOREAU, T. F. (1977). Seasonal variations of trace metals and stable isotopes in coral skeleton: Physiological and environmental controls. *Proc. Third Int. Coral Reef Symp.* **1**, 425–430.
- GOREAU, T. F. AND BOWEN, V. (1955). Calcium uptake by a coral. *Science* **122**, 1188–1189.
- GUNATILAKA, A. (1981). Biogeochemistry of strontium. In *Handbook of Stable Strontium* (ed. S. C. Skoryna), pp. 19–46. New York: Plenum Press.
- HARRIS, R. C. AND ALMY, C. C., JR (1964). A preliminary investigation into the incorporation of minor elements in the skeletal material of scleractinian corals. *Bull. mar. Sci. Gulf Caribbean* **14**, 418–423.
- HOFSTEE, B. H. J., DIXON, M. AND WEBB, E. C. (1959). Non-inverted versus inverted plots in enzyme kinetics. *Nature* **184**, 1296–1298.
- IP, Y. K. AND KRISHNAVENI, P. (1991). The incorporation of strontium ( $^{90}\text{Sr}^{2+}$ ) into the skeleton of the hermatypic coral *Galaxea fascicularis*. *J. exp. Zool.* **258**, 273–276.
- ISA, Y., IKEHARA, N. AND YAMAZATO, K. (1980). Evidence for the occurrence of  $\text{Ca}^{2+}$ -dependent adenosine triphosphatase in a hermatypic coral, *Acropora hebes* (DANA). *Sesoko mar. Sci. Lab. Tech. Rep.* **7**, 19–25.
- JEFFREY, S. W. AND HUMPHREY, G. F. (1975). New spectrophotometric equations for determining chlorophylls 'a', 'b', 'c<sub>1</sub>' and 'c<sub>2</sub>' in higher plants, algae, and natural phytoplankton. *Biochem. Physiol. Pflanz.* **167**, 191–194.
- KINSMAN, D. J. J. (1969). Interpretation of strontium concentration in carbonate minerals and rocks. *J. Sediment Petro.* **39**, 486–508.
- KREFTING, E. R., HOHLING, H. J., FELSMANN, M. AND RICHTER, K. D. (1988). Strontium as a tracer to study the transport of calcium in the epiphyseal growth plate (electronprobe microanalysis). *Histochemistry* **88**, 321–326.
- LARSEN, F. L., HINDUS, T. T. AND VINCENZI, F. F. (1978). On the red blood cell  $\text{Ca}^{2+}$ -pump: An estimate of stoichiometry. *J. Membr. Biol.* **41**, 361–376.

- LOWRY, O. H., ROSEBROUGH, N. J., FARR, A. L. AND RANDALL, R. J. (1951). Protein measurement with the Folin phenol reagent. *J. biol. Chem.* **193**, 265–275.
- MARTIN, J. B. AND DOTY, D. M. (1949). Determination of inorganic phosphate-modification of isobutyl alcohol procedure. *Analyt. Chem.* **21**, 965–967.
- ODUM, H. J. (1957). Biochemical deposition of strontium. *Publ. Inst. mar. Sci. (Texas)* **4**, 38–114.
- PERSHADSINGH, H. V. AND McDONALD, J. M. (1980). A high affinity calcium-stimulated magnesium-dependent adenosine triphosphatase in rat adipocyte plasma membranes. *J. biol. Chem.* **255**, 4087–4093.
- REED, K. C. AND BYGRAVE, F. L. (1974). The inhibition of mitochondrial calcium transport by lanthanides and ruthenium red. *Biochem. J.* **140**, 143–155.
- SARKADI, B., SZASZ, I. AND GARDOS, G. (1980). Characteristics and regulation of active calcium transport in inside-out red cell membrane vesicles. *Biochim. biophys. Acta* **598**, 326–338.
- SCHATZMANN, H. J. (1975). Active calcium transport and calcium-activated ATPase in human red cells (review of membrane Ca pump). In *Current Topics in Membranes and Transport*, vol. 6 (ed. F. Bonner and A. Kleinzeller), pp. 125–168. New York: Academic Press.
- SCHATZMANN, H. J. AND VINCENZI, F. F. (1969). Calcium movements across the membrane of human red cells. *J. Physiol., Lond.* **201**, 369–395.
- THOMPSON, G. AND LIVINGSTON, H. D. (1970). Strontium and uranium concentrations in aragonite precipitated by some modern corals. *Earth Plant Sci. Lett.* **8**, 439–442.
- VERMA, A. K. AND PENNISTON, J. T. (1981). A high affinity  $\text{Ca}^{2+}$ -stimulated and  $\text{Mg}^{2+}$ -dependent ATPase in rat corpus luteum plasma membrane fractions. *J. biol. Chem.* **256**, 1269–1275.
- WEBER, J. N. (1973). Incorporation of strontium into reef coral skeletal carbonate. *Geochim. cosmochim. Acta* **37**, 2173–2190.
